# Supplementary material for: Sorption of Monothioarsenate to the Natural Sediments and Its Competition with Arsenite and Arsenate
Source: MDPI journal article supplement (doi:10.3390/ijerph182312839), 2021-12-06
Supplement: s1 [file s1]

## **Supplementary Materials**

**Title: Sorption of monothioarsenate to the natural sediments and its competition with arsenite and arsenate**

Huimei Shan <sup>1,2,\*</sup>, Jinxian Zhang <sup>1,2</sup>, Sanxi Peng <sup>3</sup>, Hongbin Zhan <sup>4,\*</sup> and Danxue Liao <sup>1,2</sup>

1 Guangxi Key Laboratory of Environmental Pollution Control Theory and Technology, Guilin University of Technology, Guilin 541004, China

2 College of Environmental Science and Engineering, Guilin University of Technology, Guilin 541004, China

3 College of Earth Science, Guilin University of Technology, Guilin 541004, China

4 Department of Geology Geophysics, Texas A&M University, 77843, USA

\* Correspondence: shanhuimei@glut.edu.cn (H.S.); zhan@geos.tamu.edu (H.Z.)

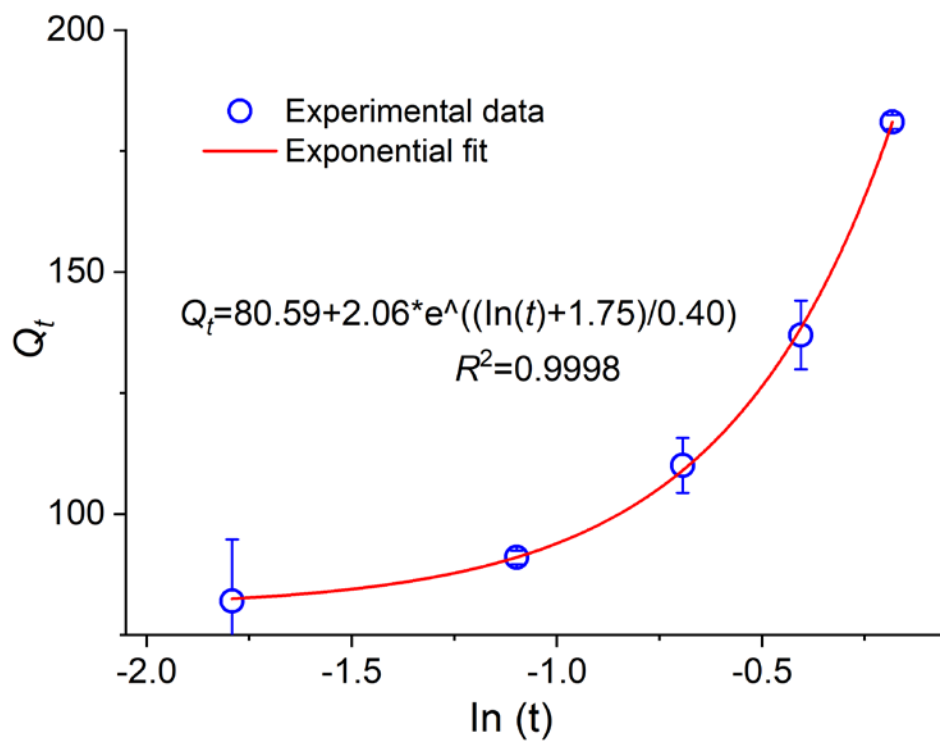

**Figure S1.** Exponential fitting curves of the relationship between  $\ln(t)$  and  $Q_t$  for 0.667 mmol/L MTAs<sup>V</sup> adsorption within 50 min.

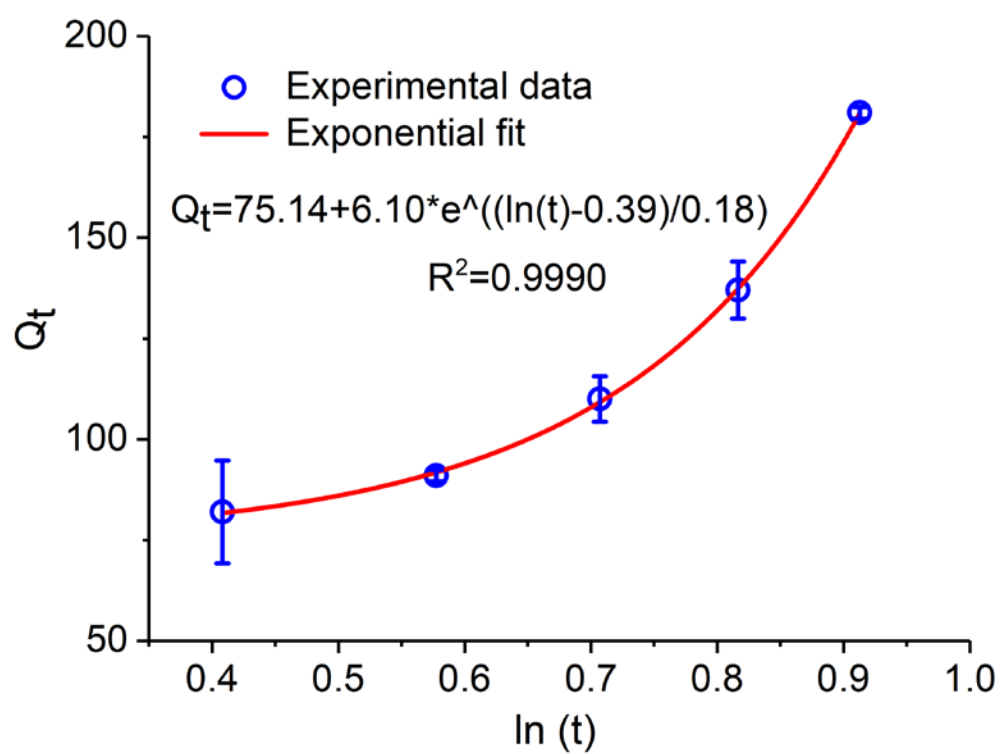

**Figure S2.** Exponential fitting curves of the relationship between  $t^{0.5}$  and  $Q_t$  for 0.667 mmol/L MTAs<sup>V</sup> adsorption within 50 min.

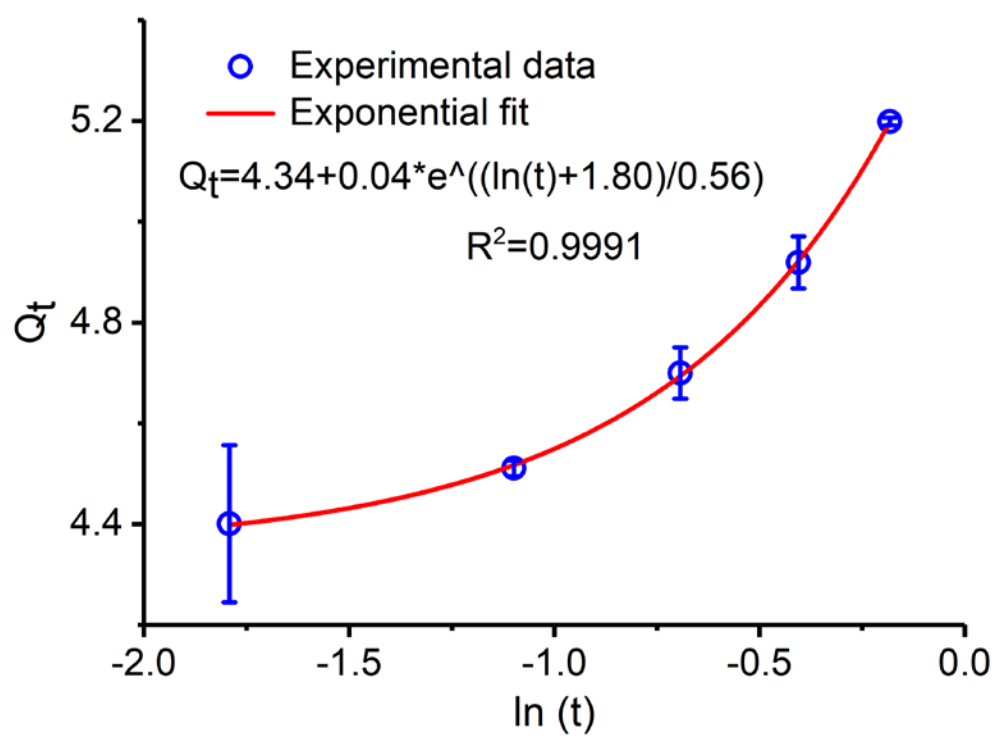

**Figure S3.** Exponential fitting curves of the relationship between  $\ln(t)$  and  $\ln(Q_t)$  for 0.667 mmol/L MTAs<sup>v</sup> adsorption within 50 min.
